# Supplementary material for: Metal mobility and toxicity of reclaimed copper smelting fly ash and smelting slag
Source: Royal Society of Chemistry journal article supplement (doi:10.1039/d0ra09704g), 2021-01-01
Supplement: d0ra09704g1.pdf [file d0ra09704g1.pdf]

# Metal Mobility and Toxicity of Reclaimed copper smelting fly ash and smelting slag

---

## Supporting Information

Jiancheng Shu<sup>a\*</sup>, Tianya Lei<sup>a</sup>, Yaling Deng<sup>a</sup>, Mengjun Chen<sup>a</sup>, Xiangfei Zeng<sup>a</sup>,  
Renlong Liu<sup>b</sup>

a. Key Laboratory of Solid Waste Treatment and Resource Recycle (SWUST), Ministry of Education, Southwest University of Science and Technology, 59 Qinglong Road, Mianyang, 621010, China

b. School of Chemistry and Chemical Engineering, Chongqing University, Chongqing, 400044, China

Corresponding author. E-mail address: shujc@swust.edu.cn

Phone: +86-0816-2419569 (Jiancheng Shu)

# Contents

---

**One figures, one table and other content are included in this supporting information**

**Fig. S1.** Flow chart of regenerated copper smelting process

**Table A.** Sequential extraction procedure for heavy metals in RCS fly ash and smelting slag by BCR

**Table B.** Fractions of metals contained in RCS fly ash and smelting slag by BCR (%)

**Fig. S1**

Copper smelting fly ash

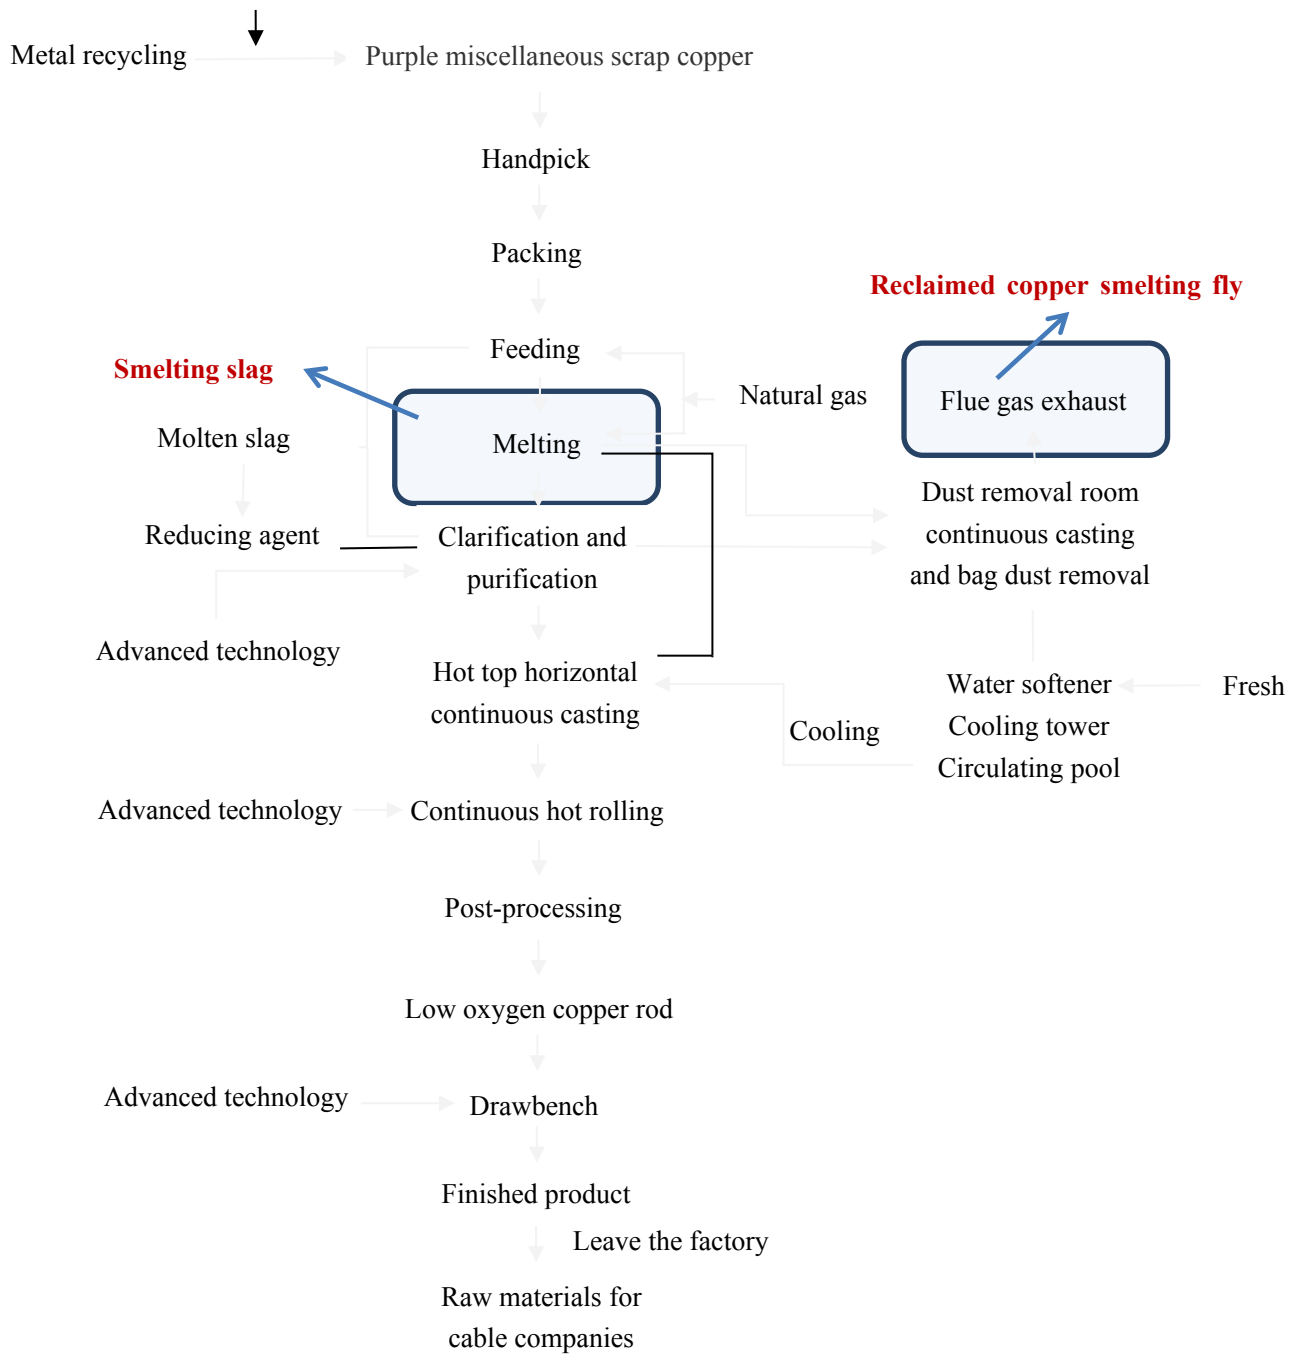

**Table A.** Sequential extraction procedure for heavy metals in RCS fly ash and smelting slag by BCR

| Chemical speciation      | Conditions                                                                                                                                                                                                                                                                  |
|--------------------------|-----------------------------------------------------------------------------------------------------------------------------------------------------------------------------------------------------------------------------------------------------------------------------|
| Exchangeable and Soluble | 0.11 mol/L HAcO, 16 h 22±5 °C                                                                                                                                                                                                                                               |
| Reducible                | 0.1 mol/L NH <sub>2</sub> OH·HCl, 16 h 22±5 °C                                                                                                                                                                                                                              |
| Oxidizable               | 8.8 mol/L H <sub>2</sub> O <sub>2</sub> (pH=2.0, HNO <sub>3</sub> , 22±5 °C 1 h and continue for 1 h at 85±2 °C), 8.8 mol/L H <sub>2</sub> O <sub>2</sub> (pH=2.0, HNO <sub>3</sub> , 85±2 °C 1 h), NH <sub>4</sub> AcO 1.0 mol/L (pH=2.0, HNO <sub>3</sub> , 22±5 °C 16 h) |
| Residual                 | digested by HF-HClO <sub>4</sub> -HNO <sub>3</sub>                                                                                                                                                                                                                          |

**Table B.** Fractions of metals contained in RCS fly ash and smelting slag by BCR (%)

| □  | RCS fly ash              |           |            |          | smelting slag            |           |            |          |
|----|--------------------------|-----------|------------|----------|--------------------------|-----------|------------|----------|
|    | Exchangeable and Soluble | Reducible | Oxidizable | Residual | Exchangeable and Soluble | Reducible | Oxidizable | Residual |
| Al | 21.085                   | 3.581     | 35.010     | 40.325   | 3.410                    | 2.282     | 8.388      | 85.920   |
| Ba | 0.573                    | 0.573     | 7.880      | 90.974   | 1.261                    | 1.835     | 6.651      | 90.252   |
| Be | 0.000                    | 0.000     | 43.636     | 56.364   | 0.000                    | 0.000     | 0.000      | 100.000  |
| Cd | 35.889                   | 24.959    | 39.152     | 0.000    | 2.857                    | 4.286     | 92.857     | 0.000    |
| Cu | 8.103                    | 13.376    | 6.745      | 71.776   | 0.128                    | 0.170     | 0.000      | 99.702   |
| Fe | 0.110                    | 0.961     | 2.530      | 96.398   | 2.406                    | 12.246    | 4.067      | 81.281   |
| Ni | 57.895                   | 42.105    | 0.000      | 0.000    | 0.252                    | 1.908     | 33.066     | 64.774   |
| Pb | 8.633                    | 6.157     | 9.697      | 75.513   | 0.234                    | 0.599     | 0.000      | 9.167    |
| Sb | 98.328                   | 1.672     | 0.000      | 0.000    | 1.269                    | 11.475    | 55.685     | 31.571   |
| Sn | 0.000                    | 0.000     | 0.000      | 100.000  | 2.082                    | 3.517     | 0.000      | 94.401   |
| Tl | 72.550                   | 1.383     | 13.193     | 12.874   | 11.214                   | 0.000     | 0.000      | 88.786   |
| Zn | 31.217                   | 23.708    | 12.479     | 32.596   | 3.786                    | 8.725     | 8.857      | 78.633   |
| Se | 23.000                   | 34.000    | 38.000     | 5.000    | 32.000                   | 29.000    | 24.000     | 15.000   |
| Au | 11.203                   | 88.797    | 0.000      | 0.000    | 0.000                    | 0.391     | 9.766      | 89.844   |
